# Supplementary material for: A Quantitative Systems Approach Reveals Dynamic Control of tRNA Modifications during Cellular Stress
Source: PubMed Central journal article supplement (PMC3002981; doi:10.1371/journal.pgen.1001247), 2010-12-16
Supplement: pgen.1001247.s004.pdf [file pgen.1001247.s004.pdf]

|                                   | Control |       | 2 mM H <sub>2</sub> O <sub>2</sub> |       |       | 5 mM H <sub>2</sub> O <sub>2</sub> |       |       | 12 mM H <sub>2</sub> O <sub>2</sub> |       |       | 0.05% MMS    |       |       | 0.1% MMS     |       |       | 0.2% MMS     |       |       |
|-----------------------------------|---------|-------|------------------------------------|-------|-------|------------------------------------|-------|-------|-------------------------------------|-------|-------|--------------|-------|-------|--------------|-------|-------|--------------|-------|-------|
|                                   | Average | SD    | Average                            | SD    | Ttest | Average                            | SD    | Ttest | Average                             | SD    | Ttest | Average      | SD    | Ttest | Average      | SD    | Ttest | Average      | SD    | Ttest |
| Y                                 | 82422   | 12427 | 86396                              | 32354 | 0.85  | 83407                              | 31689 | 0.96  | 74716                               | 19789 | 0.60  | 77661        | 3308  | 0.56  | 70294        | 7321  | 0.22  | 73517        | 6950  | 0.34  |
| D                                 | 1686    | 13    | 1986                               | 281   | 0.14  | 1842                               | 79    | 0.03  | 2254                                | 171   | 0.00  | 1700         | 70    | 0.76  | 1985         | 221   | 0.08  | 1921         | 391   | 0.36  |
| n <sup>cm5</sup> Um               | 1664    | 135   | 1916                               | 277   | 0.23  | 1759                               | 214   | 0.55  | 1821                                | 281   | 0.43  | 1769         | 179   | 0.46  | 1841         | 199   | 0.27  | 1941         | 135   | 0.07  |
| I                                 | 250480  | 1392  | 257046                             | 12547 | 0.42  | 241875                             | 17587 | 0.45  | 250050                              | 20166 | 0.97  | 223885       | 12822 | 0.02  | 210225       | 16080 | 0.01  | 220102       | 8971  | 0.00  |
| m <sup>5</sup> U                  | 1675    | 88    | 1537                               | 155   | 0.25  | 1430                               | 221   | 0.15  | 1395                                | 177   | 0.07  | 1619         | 133   | 0.58  | 1695         | 109   | 0.82  | 1518         | 128   | 0.16  |
| Gm                                | 45474   | 1577  | 49022                              | 2453  | 0.10  | 41391                              | 3670  | 0.15  | 42649                               | 2117  | 0.14  | 39611        | 2775  | 0.03  | 38677        | 2047  | 0.01  | 36970        | 3531  | 0.02  |
| Um                                | 279     | 24    | 413                                | 75    | 0.04  | 264                                | 49    | 0.67  | 304                                 | 32    | 0.34  | 233          | 33    | 0.12  | 254          | 14    | 0.20  | 249          | 57    | 0.44  |
| m <sup>5</sup> C                  | 39253   | 16194 | 75290                              | 4063  | 0.02  | 84353                              | 32490 | 0.10  | 77521                               | 23005 | 0.08  | 33226        | 7583  | 0.59  | 33177        | 18704 | 0.69  | 28240        | 11893 | 0.40  |
| m <sup>3</sup> C                  | 10889   | 703   | 10921                              | 793   | 0.96  | 11637                              | 4111  | 0.77  | 9960                                | 230   | 0.10  | 13262        | 563   | 0.01  | 15328        | 412   | 0.00  | 13048        | 3166  | 0.31  |
| Cm                                | 25418   | 1842  | 38600                              | 2591  | 0.00  | 39780                              | 4380  | 0.01  | 38679                               | 951   | 0.00  | 21883        | 1804  | 0.08  | 19956        | 2916  | 0.05  | 19031        | 1456  | 0.01  |
| m <sup>cm5</sup> U                | 245     | 22    | 213                                | 26    | 0.17  | 207                                | 65    | 0.39  | 207                                 | 21    | 0.09  | 248          | 11    | 0.89  | 284          | 33    | 0.17  | 265          | 32    | 0.43  |
| m <sup>7</sup> G                  | 65612   | 9718  | 59284                              | 7193  | 0.42  | 77334                              | 45788 | 0.69  | 50903                               | 1049  | 0.06  | 106987       | 6999  | 0.00  | 143214       | 7346  | 0.00  | 116659       | 49765 | 0.16  |
| m <sup>1</sup> G                  | 59822   | 2872  | 51537                              | 3469  | 0.03  | 48143                              | 7020  | 0.06  | 45700                               | 5714  | 0.02  | 55953        | 3142  | 0.19  | 57718        | 1657  | 0.33  | 51272        | 4363  | 0.05  |
| m <sup>2</sup> G                  | 67775   | 3772  | 57313                              | 6617  | 0.08  | 53298                              | 11990 | 0.12  | 52085                               | 12215 | 0.10  | 61161        | 7695  | 0.25  | 58984        | 3730  | 0.05  | 53313        | 5269  | 0.02  |
| ac <sup>4</sup> C                 | 178172  | 8545  | 189350                             | 12934 | 0.28  | 183742                             | 5507  | 0.40  | 191576                              | 16123 | 0.27  | 178450       | 7044  | 0.97  | 167917       | 18329 | 0.43  | 166783       | 15679 | 0.33  |
| t <sup>6</sup> A                  | 60740   | 1623  | 53669                              | 3863  | 0.04  | 49925                              | 4521  | 0.02  | 123421                              | 8103  | 0.00  | 55981        | 3326  | 0.09  | 55864        | 1870  | 0.03  | 51368        | 2652  | 0.01  |
| m <sup>cm5</sup> s <sup>2</sup> U | 513     | 65    | 458                                | 54    | 0.32  | 382                                | 13    | 0.03  | 367                                 | 35    | 0.03  | 448          | 16    | 0.17  | 444          | 50    | 0.22  | 376          | 35    | 0.03  |
| m <sup>1</sup> I                  | 3128    | 317   | 2966                               | 44    | 0.43  | 2702                               | 417   | 0.23  | 2594                                | 295   | 0.10  | 3054         | 41    | 0.71  | 3002         | 211   | 0.60  | 2675         | 348   | 0.17  |
| Am                                | 82676   | 2070  | 94388                              | 5736  | 0.03  | 73858                              | 12598 | 0.30  | 81631                               | 5185  | 0.76  | 64714        | 6106  | 0.01  | 63191        | 2913  | 0.00  | 65214        | 12956 | 0.08  |
| m <sup>2</sup> <sub>2</sub> G     | 133248  | 4375  | 257373                             | 2009  | 0.00  | 280206                             | 29780 | 0.00  | 309183                              | 13971 | 0.00  | 122876       | 7381  | 0.10  | 125986       | 1482  | 0.05  | 112355       | 6407  | 0.01  |
| i <sup>6</sup> A                  | 12673   | 3141  | 9592                               | 1197  | 0.19  | 9094                               | 1656  | 0.16  | 8926                                | 1585  | 0.14  | 10061        | 849   | 0.24  | 9117         | 394   | 0.12  | 8627         | 433   | 0.09  |
| yW                                | 254     | 14    | 204                                | 18    | 0.02  | 173                                | 21    | 0.00  | 186                                 | 20    | 0.01  | 217          | 7     | 0.01  | 201          | 40    | 0.09  | 180          | 35    | 0.03  |
| m <sup>1</sup> A                  | 141199  | 6656  | 123987                             | 8584  | 0.05  | 125365                             | 34747 | 0.48  | 111213                              | 15492 | 0.04  | 155570       | 8122  | 0.08  | 166538       | 910   | 0.00  | 144187       | 24864 | 0.85  |
|                                   |         |       |                                    |       |       |                                    |       |       |                                     |       |       |              |       |       |              |       |       |              |       |       |
|                                   | Control |       | 20 mM NaAsO <sub>2</sub>           |       |       | 40 mM NaAsO <sub>2</sub>           |       |       | 60 mM NaAsO <sub>2</sub>            |       |       | 3.2 mM NaOCl |       |       | 4.0 mM NaOCl |       |       | 4.8 mM NaOCl |       |       |
|                                   | Average | SD    | Average                            | SD    | Ttest | Average                            | SD    | Ttest | Average                             | SD    | Ttest | Average      | SD    | Ttest | Average      | SD    | Ttest | Average      | SD    | Ttest |
| Y                                 | 82422   | 12427 | 71278                              | 6480  | 0.24  | 70560                              | 13529 | 0.33  | 64565                               | 10194 | 0.13  | 91794        | 13401 | 0.42  | 84461        | 8690  | 0.83  | 82114        | 13904 | 0.98  |
| D                                 | 1686    | 13    | 646                                | 129   | 0.79  | 780                                | 152   | 0.68  | 643                                 | 153   | 0.78  | 821          | 165   | 0.55  | 986          | 90    | 0.17  | 954          | 168   | 0.25  |
| n <sup>cm5</sup> Um               | 1664    | 135   | 225                                | 15    | 0.07  | 239                                | 37    | 0.44  | 189                                 | 12    | 0.00  | 289          | 72    | 0.53  | 511          | 464   | 0.40  | 258          | 59    | 0.97  |
| I                                 | 250480  | 1392  | 176791                             | 24022 | 0.50  | 164125                             | 15479 | 0.92  | 138153                              | 4467  | 0.02  | 171485       | 8437  | 0.51  | 164512       | 5825  | 0.91  | 148475       | 14172 | 0.19  |
| m <sup>5</sup> U                  | 1675    | 88    | 87325                              | 11710 | 0.36  | 85861                              | 5299  | 0.13  | 87900                               | 7364  | 0.27  | 118264       | 16693 | 0.10  | 118582       | 3773  | 0.01  | 101952       | 9384  | 0.40  |
| Gm                                | 45474   | 1577  | 62376                              | 8050  | 0.02  | 67489                              | 1734  | 0.01  | 84669                               | 5938  | 0.73  | 127864       | 8201  | 0.00  | 120941       | 1250  | 0.00  | 97826        | 7735  | 0.05  |
| Um                                | 279     | 24    | 242                                | 39    | 0.15  | 235                                | 31    | 0.07  | 182                                 | 11    | 0.00  | 280          | 16    | 0.63  | 259          | 3     | 0.09  | 250          | 45    | 0.25  |
| m <sup>5</sup> C                  | 39253   | 16194 | 93100                              | 11042 | 0.76  | 86918                              | 8329  | 0.62  | 71430                               | 3273  | 0.02  | 92691        | 5347  | 0.72  | 88108        | 4016  | 0.66  | 81446        | 9267  | 0.27  |
| m <sup>3</sup> C                  | 10889   | 703   | 154839                             | 21460 | 0.48  | 146691                             | 14931 | 0.79  | 117558                              | 9635  | 0.05  | 130656       | 16219 | 0.34  | 132287       | 3785  | 0.22  | 126490       | 14136 | 0.20  |
| Cm                                | 25418   | 1842  | 129941                             | 21137 | 0.74  | 126325                             | 13108 | 0.89  | 104067                              | 7433  | 0.09  | 117919       | 11146 | 0.55  | 116662       | 2554  | 0.38  | 110416       | 12166 | 0.25  |
| m <sup>cm5</sup> U                | 245     | 22    | 203800                             | 9591  | 0.24  | 209163                             | 8493  | 0.39  | 217528                              | 15976 | 0.85  | 252051       | 19311 | 0.11  | 260166       | 6120  | 0.02  | 237714       | 13057 | 0.26  |
| m <sup>7</sup> G                  | 65612   | 9718  | 21142                              | 2459  | 0.62  | 20440                              | 1549  | 0.29  | 18978                               | 1223  | 0.06  | 23781        | 3119  | 0.44  | 23964        | 775   | 0.15  | 21640        | 2214  | 0.81  |
| m <sup>1</sup> G                  | 59822   | 2872  | 59705                              | 5138  | 0.19  | 57821                              | 6389  | 0.15  | 49945                               | 3083  | 0.01  | 65494        | 6507  | 0.81  | 63792        | 4870  | 0.54  | 61653        | 8554  | 0.44  |
| m <sup>2</sup> G                  | 67775   | 3772  | 4285                               | 979   | 0.85  | 3672                               | 587   | 0.23  | 3316                                | 836   | 0.16  | 3018         | 326   | 0.01  | 3178         | 615   | 0.05  | 3186         | 242   | 0.00  |
| ac <sup>4</sup> C                 | 178172  | 8545  | 522                                | 69    | 0.93  | 487                                | 69    | 0.55  | 374                                 | 32    | 0.04  | 492          | 40    | 0.53  | 478          | 58    | 0.43  | 447          | 65    | 0.25  |
| t <sup>6</sup> A                  | 60740   | 1623  | 13327                              | 2307  | 0.25  | 14062                              | 2288  | 0.37  | 11717                               | 1381  | 0.07  | 14069        | 604   | 0.28  | 14363        | 19    | 0.33  | 13277        | 1252  | 0.18  |
| m <sup>cm5</sup> s <sup>2</sup> U | 513     | 65    | 226                                | 29    | 0.13  | 249                                | 50    | 0.68  | 252                                 | 50    | 0.75  | 376          | 54    | 0.03  | 386          | 19    | 0.00  | 317          | 35    | 0.07  |
| m <sup>1</sup> I                  | 3128    | 317   | 2513                               | 461   | 0.33  | 2087                               | 234   | 0.44  | 1827                                | 302   | 0.10  | 2153         | 65    | 0.42  | 1885         | 109   | 0.02  | 1948         | 296   | 0.22  |
| Am                                | 82676   | 2070  | 48771                              | 9709  | 0.73  | 44164                              | 17102 | 0.55  | 24144                               | 14414 | 0.06  | 27036        | 18513 | 0.12  | 28589        | 6125  | 0.04  | 38245        | 14717 | 0.28  |
| m <sup>2</sup> <sub>2</sub> G     | 133248  | 4375  | 10785                              | 1185  | 0.62  | 9524                               | 1143  | 0.55  | 8215                                | 677   | 0.09  | 10249        | 1516  | 0.98  | 9390         | 1575  | 0.54  | 9648         | 1818  | 0.69  |
| i <sup>6</sup> A                  | 12673   | 3141  | 24804                              | 4325  | 0.41  | 23893                              | 4033  | 0.29  | 18889                               | 7032  | 0.13  | 23094        | 11411 | 0.52  | 25705        | 3299  | 0.49  | 26144        | 5728  | 0.66  |
| yW                                | 254     | 14    | 164928                             | 23674 | 0.89  | 155837                             | 15424 | 0.56  | 135192                              | 4577  | 0.01  | 156039       | 8431  | 0.44  | 150193       | 3051  | 0.12  | 140531       | 14810 | 0.10  |
| m <sup>1</sup> A                  | 141199  | 6656  | 1012                               | 191   | 0.76  | 1242                               | 278   | 0.39  | 1096                                | 302   | 0.87  | 1177         | 325   | 0.62  | 1339         | 175   | 0.13  | 1467         | 295   | 0.11  |
