# Supplementary material for: A Quantitative Systems Approach Reveals Dynamic Control of tRNA Modifications during Cellular Stress
Source: PubMed Central journal article supplement (PMC3002981; doi:10.1371/journal.pgen.1001247), 2010-12-16
Supplement: pgen.1001247.s005.pdf [file pgen.1001247.s005.pdf]

| <i>Nucleoside</i> | <b>H<sub>2</sub>O<sub>2</sub>, mM</b> |          |           | <b>MMS, mM</b> |           |           | <b>NaAsO<sub>2</sub>, mM</b> |           |           | <b>NaOCl, mM</b> |            |            |
|-------------------|---------------------------------------|----------|-----------|----------------|-----------|-----------|------------------------------|-----------|-----------|------------------|------------|------------|
|                   | <b>2</b>                              | <b>5</b> | <b>12</b> | <b>6</b>       | <b>12</b> | <b>24</b> | <b>20</b>                    | <b>40</b> | <b>60</b> | <b>3.2</b>       | <b>4.0</b> | <b>4.8</b> |
| <b>D</b>          | 1.1776                                | 1.0922   | 1.3363    | 1.0081         | 1.1772    | 1.1388    | 0.9256                       | 1.1180    | 0.9220    | 1.1761           | 1.4134     | 1.3679     |
| <b>Y</b>          | 1.0482                                | 1.0119   | 0.9065    | 0.9422         | 0.8529    | 0.8920    | 0.8648                       | 0.8561    | 0.7833    | 1.1137           | 1.0247     | 0.9963     |
| <b>ncm5U</b>      | 1.1513                                | 1.0570   | 1.0944    | 1.0630         | 1.1063    | 1.1663    | 0.9546                       | 1.1713    | 1.0332    | 1.1096           | 1.2622     | 1.3835     |
| <b>I</b>          | 1.0262                                | 0.9656   | 0.9983    | 0.8938         | 0.8393    | 0.8787    | 0.9245                       | 0.9488    | 0.9868    | 1.1434           | 1.1802     | 1.0783     |
| <b>m5U</b>        | 0.9175                                | 0.8539   | 0.8327    | 0.9667         | 1.0116    | 0.9063    | 1.1371                       | 0.9442    | 0.8266    | 0.9740           | 0.8527     | 0.8812     |
| <b>Gm</b>         | 1.0780                                | 0.9102   | 0.9379    | 0.8711         | 0.8505    | 0.8130    | 0.9136                       | 0.8983    | 0.9196    | 1.2373           | 1.2406     | 1.0666     |
| <b>Um</b>         | 1.4809                                | 0.9475   | 1.0909    | 0.8337         | 0.9114    | 0.8911    | 0.8604                       | 0.9491    | 0.9600    | 1.4291           | 1.4703     | 1.2047     |
| <b>m5C</b>        | 1.9181                                | 2.1490   | 1.9749    | 0.8465         | 0.8452    | 0.7194    | 0.9374                       | 0.8488    | 0.4640    | 0.5196           | 0.5495     | 0.7351     |
| <b>m3C</b>        | 1.0029                                | 1.0686   | 0.9147    | 1.2179         | 1.4076    | 1.1983    | 1.0562                       | 0.9328    | 0.8045    | 1.0038           | 0.9196     | 0.9449     |
| <b>Cm</b>         | 1.5186                                | 1.5650   | 1.5217    | 0.8609         | 0.7851    | 0.7487    | 0.8823                       | 0.8499    | 0.6719    | 0.8215           | 0.9144     | 0.9300     |
| <b>mcm5U</b>      | 0.8664                                | 0.8426   | 0.8425    | 1.0088         | 1.1558    | 1.0803    | 0.8685                       | 0.9214    | 0.7289    | 1.1145           | 1.9679     | 0.9937     |
| <b>m7G</b>        | 0.9036                                | 1.1787   | 0.7758    | 1.6306         | 2.1827    | 1.7780    | 1.0280                       | 0.9597    | 0.7887    | 1.0235           | 0.9729     | 0.8993     |
| <b>m1G</b>        | 0.8615                                | 0.8048   | 0.7639    | 0.9353         | 0.9648    | 0.8571    | 1.0790                       | 1.0222    | 0.8192    | 0.9104           | 0.9218     | 0.8814     |
| <b>m2G</b>        | 0.8456                                | 0.7864   | 0.7685    | 0.9024         | 0.8703    | 0.7866    | 1.0417                       | 1.0128    | 0.8343    | 0.9454           | 0.9353     | 0.8852     |
| <b>ac4C</b>       | 1.0627                                | 1.0313   | 1.0752    | 1.0016         | 0.9424    | 0.9361    | 0.9587                       | 0.9269    | 0.8606    | 1.0784           | 1.0867     | 0.9813     |
| <b>t6A</b>        | 0.8836                                | 0.8219   | 2.0319    | 0.9217         | 0.9197    | 0.8457    | 0.8940                       | 0.8658    | 0.7478    | 0.9807           | 0.9552     | 0.9232     |
| <b>mcm5s2U</b>    | 0.8926                                | 0.7445   | 0.7145    | 0.8738         | 0.8654    | 0.7323    | 0.9896                       | 0.9235    | 0.7086    | 0.9320           | 0.9047     | 0.8471     |
| <b>m1I</b>        | 0.9483                                | 0.8638   | 0.8293    | 0.9763         | 0.9597    | 0.8553    | 1.0272                       | 0.8801    | 0.7948    | 0.7234           | 0.7616     | 0.7636     |
| <b>Am</b>         | 1.1417                                | 0.8933   | 0.9874    | 0.7827         | 0.7643    | 0.7888    | 0.7512                       | 0.8127    | 1.0196    | 1.5398           | 1.4564     | 1.1781     |
| <b>m22G</b>       | 1.9315                                | 2.1029   | 2.3204    | 0.9222         | 0.9455    | 0.8432    | 1.0138                       | 0.9579    | 0.8310    | 0.9592           | 0.9232     | 0.8638     |
| <b>i6A</b>        | 0.7569                                | 0.7176   | 0.7043    | 0.7939         | 0.7194    | 0.6807    | 0.8232                       | 0.8686    | 0.7238    | 0.8691           | 0.8873     | 0.8201     |
| <b>yW</b>         | 0.8016                                | 0.6805   | 0.7323    | 0.8534         | 0.7893    | 0.7091    | 0.8377                       | 0.8156    | 0.6297    | 0.9715           | 0.8964     | 0.8647     |
| <b>m1A</b>        | 0.8781                                | 0.8879   | 0.7876    | 1.1018         | 1.1795    | 1.0212    | 1.0690                       | 0.9924    | 0.8353    | 1.0369           | 0.9947     | 0.8978     |

\* Shading color indicates significant difference from control by Student's t-test: green,  $p < 0.05$ ; yellow,  $p < 0.1$
