# Supplementary material for: A Quantitative Systems Approach Reveals Dynamic Control of tRNA Modifications during Cellular Stress
Source: PubMed Central journal article supplement (PMC3002981; doi:10.1371/journal.pgen.1001247), 2010-12-16
Supplement: pgen.1001247.s006.pdf [file pgen.1001247.s006.pdf]

|                                   | <b>PC1</b> | <b>PC2</b> | <b>PC3</b> |
|-----------------------------------|------------|------------|------------|
| <b>H<sub>2</sub>O<sub>2</sub></b> | 74%        | 6.9%       | 0.45%      |
| <b>MMS</b>                        | 11%        | 42%        | 21%        |
| <b>NaAsO<sub>2</sub></b>          | 6.2%       | 2.8%       | 53%        |
| <b>NaOCl</b>                      | 8.7%       | 49%        | 26%        |
