# Supplementary material for: A Quantitative Systems Approach Reveals Dynamic Control of tRNA Modifications during Cellular Stress
Source: PubMed Central journal article supplement (PMC3002981; doi:10.1371/journal.pgen.1001247), 2010-12-16
Supplement: pgen.1001247.s008.pdf [file pgen.1001247.s008.pdf]

|         | <i>trm1</i> | <i>trm2</i> | <i>trm3</i> | <i>trm4</i> | <i>trm7</i> | <i>trm8</i> | <i>trm82</i> | <i>tad1</i> | <i>mod5</i> | <i>tan1</i> | <i>trm9</i> | <i>trm10</i> | <i>trm11</i> | <i>trm12</i> | <i>trm13</i> | <i>trm44</i> | <i>trm5</i> |
|---------|-------------|-------------|-------------|-------------|-------------|-------------|--------------|-------------|-------------|-------------|-------------|--------------|--------------|--------------|--------------|--------------|-------------|
| D       | 0.713842    | 0.6843      | 0.799161    | 0.828137    | 0.899072    | 0.825256    | 0.796538     | 0.544596    | 0.514717    | 0.583547    | 0.687507    | 0.706263     | 0.695729     | 0.630171     | 0.753443     | 0.793753     | 1.224693    |
| I       | 1.026083    | 0.947245    | 1.184603    | 0.916817    | 0.796736    | 0.960603    | 1.223109     | 1.015979    | 0.624147    | 1.207896    | 1.164556    | 1.0172       | 0.892598     | 0.877719     | 0.909553     | 0.959943     | 0.948123    |
| m5U     | 0.987038    | 0.00001     | 1.127997    | 0.971096    | 0.853232    | 0.945465    | 1.114468     | 0.879221    | 0.785055    | 1.037878    | 1.211402    | 0.972925     | 0.824946     | 0.893913     | 0.857149     | 0.95087      | 0.689327    |
| ncm5Um  | 1.115053    | 1.442154    | 1.557688    | 1.00714     | 0.00001     | 0.99317     | 1.240788     | 1.010364    | 0.714159    | 0.97679     | 1.332745    | 1.804322     | 1.088102     | 1.150931     | 1.045787     | 1.204891     | 0.935474    |
| Gm      | 0.892365    | 0.917907    | 0.969365    | 1.057554    | 0.765217    | 1.150425    | 1.355311     | 1.001871    | 0.743076    | 1.143667    | 0.95433     | 0.797357     | 0.907308     | 0.892193     | 1.034241     | 1.032041     | 1.583797    |
| Um      | 0.707096    | 0.799301    | 0.772762    | 0.721069    | 0.498528    | 1.063909    | 1.225548     | 0.888201    | 0.582973    | 1.000561    | 0.68786     | 0.580268     | 0.696481     | 0.72486      | 0.755065     | 0.529322     | 1.798396    |
| m3C     | 1.009635    | 1.007132    | 1.117877    | 0.925553    | 0.818491    | 1.274988    | 1.640635     | 1.30592     | 0.720901    | 1.474109    | 0.984104    | 0.964265     | 0.804095     | 0.805582     | 0.83824      | 0.931621     | 0.754647    |
| m5C     | 1.082153    | 1.039257    | 1.226132    | 0.074026    | 0.805458    | 1.312151    | 1.443209     | 1.315717    | 0.838067    | 1.44199     | 1.210642    | 1.057321     | 0.965305     | 0.979524     | 0.993751     | 1.10052      | 0.791606    |
| Cm      | 0.989427    | 0.929491    | 0.725017    | 0.870177    | 0.47594     | 1.201562    | 1.43464      | 1.120126    | 0.756758    | 1.305789    | 0.949605    | 0.709137     | 0.830921     | 0.832116     | 0.68439      | 0.911343     | 1.403351    |
| mcm5U   | 1.00257     | 1.233468    | 1.156333    | 1.043397    | 0.945752    | 1.286914    | 1.639825     | 1.240346    | 0.788122    | 1.466071    | 0.00001     | 1.302712     | 1.20087      | 1.265654     | 1.309793     | 1.449138     | 0.627248    |
| m7G     | 1.127881    | 1.013837    | 1.152332    | 0.947088    | 0.828513    | 0.114377    | 0.127359     | 1.4128      | 0.876977    | 1.677075    | 1.266986    | 1.018026     | 0.977665     | 1.02766      | 1.04834      | 1.173779     | 0.721473    |
| m1G     | 1.307866    | 1.100389    | 1.156634    | 1.111559    | 1.055314    | 1.341812    | 1.757386     | 1.416961    | 0.904092    | 1.658933    | 1.260681    | 0.298146     | 0.960458     | 0.977426     | 0.974135     | 1.157466     | 0.607465    |
| m2G     | 1.057559    | 1.092171    | 1.173847    | 0.951106    | 0.844212    | 1.358752    | 1.765857     | 1.316199    | 0.825633    | 1.522788    | 1.308046    | 1.058935     | 0.00001      | 0.973728     | 1.02583      | 1.12363      | 0.635986    |
| ac4C    | 0.923116    | 0.957369    | 1.082035    | 0.909021    | 0.752637    | 1.061283    | 1.293255     | 0.939698    | 0.65876     | 0.30954     | 1.004896    | 0.874492     | 0.885059     | 0.891602     | 0.961265     | 0.965705     | 1.118684    |
| t6A     | 1.097099    | 0.993229    | 1.106762    | 0.956773    | 0.90882     | 1.185038    | 1.532206     | 1.279125    | 0.756742    | 1.425328    | 1.187497    | 1.067276     | 0.906737     | 0.930285     | 0.953587     | 1.069266     | 0.63846     |
| mcm5s2U | 1.130653    | 1.127265    | 1.287195    | 0.953813    | 0.949808    | 1.187338    | 1.546039     | 1.277672    | 0.724113    | 1.400445    | 0.00001     | 1.311106     | 1.038589     | 1.041001     | 1.130092     | 1.255393     | 0.561531    |
| m1I     | 1.171277    | 1.210978    | 1.043962    | 1.044721    | 0.919583    | 1.33084     | 1.680196     | 0.00001     | 0.83825     | 1.598951    | 1.354337    | 1.076146     | 1.040276     | 1.079506     | 1.073863     | 1.212763     | 0.638423    |
| Am      | 0.783387    | 0.792853    | 0.772943    | 0.800324    | 0.545612    | 1.015545    | 1.15388      | 0.828891    | 0.699742    | 0.945327    | 1.320257    | 1.188623     | 1.097077     | 1.13754      | 1.156384     | 1.295224     | 1.959991    |
| m22G    | 0.00001     | 1.042508    | 1.149887    | 0.978005    | 0.833386    | 1.252354    | 1.649986     | 1.292432    | 0.800677    | 1.493383    | 1.22816     | 1.073447     | 0.940472     | 0.978967     | 0.992541     | 1.112964     | 1.963598    |
| i6A     | 1.00373     | 1.013344    | 1.249815    | 1.071445    | 0.904218    | 0.954777    | 1.281665     | 1.203227    | 0.012504    | 1.26141     | 1.182784    | 1.178433     | 0.903244     | 0.929682     | 0.95893      | 0.933019     | 0.681736    |
| yW      | 1.408351    | 1.147706    | 1.406329    | 0.826683    | 0.00001     | 0.488963    | 0.559251     | 0.48456     | 0.424868    | 0.512475    | 1.127805    | 1.206756     | 0.473142     | 0.00001      | 0.935482     | 0.944868     | 0.279563    |
| m1A     | 1.099058    | 0.944103    | 1.112871    | 0.944254    | 0.838408    | 1.289652    | 1.379047     | 1.389095    | 0.883242    | 1.571972    | 1.17681     | 0.963162     | 0.88898      | 0.921767     | 0.937037     | 1.049542     | 0.767246    |
| ncm5U   | 0.708553    | 0.640167    | 0.724605    | 0.711749    | 0.810952    | 0.993275    | 0.805267     | 0.606002    | 0.822832    | 0.743067    | 0.847963    | 0.886971     | 0.718471     | 0.762053     | 0.930234     | 0.869326     | 0.91634     |
