# Supplementary material for: A Quantitative Systems Approach Reveals Dynamic Control of tRNA Modifications during Cellular Stress
Source: PubMed Central journal article supplement (PMC3002981; doi:10.1371/journal.pgen.1001247), 2010-12-16
Supplement: pgen.1001247.s009.pdf [file pgen.1001247.s009.pdf]

| <b>Position<br/>in tRNA</b> | <b>Nucleosides<br/>Affected by<br/>Exposure</b> | <b>Nucleosides<br/>Critical to<br/>Surviving<br/>Exposure</b> |
|-----------------------------|-------------------------------------------------|---------------------------------------------------------------|
| 10                          | 2                                               |                                                               |
| 18                          | 1                                               |                                                               |
| 26                          | 1                                               | 1                                                             |
| 31                          |                                                 |                                                               |
| 32                          | 2                                               | 1                                                             |
| 33                          |                                                 |                                                               |
| 34                          | 5                                               | 5                                                             |
| 35                          | 1                                               |                                                               |
| 36                          |                                                 |                                                               |
| 37                          | 3                                               |                                                               |
| 38                          |                                                 |                                                               |
| 39                          |                                                 |                                                               |
| 44                          |                                                 | 1                                                             |
| 46                          | 1                                               |                                                               |
| 58                          |                                                 |                                                               |
