# Supplementary material for: A Quantitative Systems Approach Reveals Dynamic Control of tRNA Modifications during Cellular Stress
Source: PubMed Central journal article supplement (PMC3002981; doi:10.1371/journal.pgen.1001247), 2010-12-16
Supplement: pgen.1001247.s010.pdf [file pgen.1001247.s010.pdf]

|              | <i>trm1</i> | <i>trm2</i> | <i>trm3</i> | <i>trm4</i> | <i>trm7</i> | <i>trm8</i> | <i>trm82</i> | <i>tad1</i> | <i>mod5</i> | <i>tan1</i> | <i>trm9</i> | <i>trm10</i> | <i>trm11</i> | <i>trm12</i> | <i>trm13</i> | <i>trm44</i> | <i>trm5</i> |
|--------------|-------------|-------------|-------------|-------------|-------------|-------------|--------------|-------------|-------------|-------------|-------------|--------------|--------------|--------------|--------------|--------------|-------------|
| <i>trm1</i>  |             |             |             |             |             |             |              |             |             |             |             |              |              |              |              |              |             |
| <i>trm2</i>  | 0.29        |             |             |             |             |             |              |             |             |             |             |              |              |              |              |              |             |
| <i>trm3</i>  | 0.44        | 0.52        |             |             |             |             |              |             |             |             |             |              |              |              |              |              |             |
| <i>trm4</i>  | 0.08        | 0.15        | 0.18        |             |             |             |              |             |             |             |             |              |              |              |              |              |             |
| <i>trm7</i>  | -0.11       | -0.20       | -0.19       | 0.16        |             |             |              |             |             |             |             |              |              |              |              |              |             |
| <i>trm8</i>  | -0.10       | 0.18        | -0.05       | 0.02        | 0.38        |             |              |             |             |             |             |              |              |              |              |              |             |
| <i>trm82</i> | -0.03       | 0.31        | 0.13        | 0.19        | 0.38        | 0.95        |              |             |             |             |             |              |              |              |              |              |             |
| <i>tad1</i>  | 0.04        | 0.20        | 0.31        | 0.06        | 0.31        | 0.23        | 0.32         |             |             |             |             |              |              |              |              |              |             |
| <i>mod5</i>  | 0.02        | 0.03        | -0.08       | -0.06       | 0.26        | 0.33        | 0.26         | 0.24        |             |             |             |              |              |              |              |              |             |
| <i>tan1</i>  | 0.16        | 0.33        | 0.23        | 0.20        | 0.51        | 0.39        | 0.50         | 0.58        | 0.46        |             |             |              |              |              |              |              |             |
| <i>trm9</i>  | 0.08        | -0.02       | 0.16        | -0.01       | -0.17       | -0.08       | -0.05        | -0.03       | 0.08        | 0.13        |             |              |              |              |              |              |             |
| <i>trm10</i> | 0.13        | 0.42        | 0.63        | 0.07        | -0.35       | -0.07       | 0.01         | 0.03        | -0.10       | 0.04        | 0.00        |              |              |              |              |              |             |
| <i>trm11</i> | -0.04       | 0.16        | 0.08        | 0.09        | 0.14        | 0.06        | 0.09         | 0.08        | 0.13        | 0.20        | -0.18       | 0.23         |              |              |              |              |             |
| <i>trm12</i> | -0.12       | 0.19        | 0.05        | 0.19        | 0.44        | 0.42        | 0.46         | 0.38        | 0.41        | 0.54        | -0.05       | 0.26         | 0.55         |              |              |              |             |
| <i>trm13</i> | 0.14        | 0.46        | 0.40        | 0.19        | 0.17        | 0.11        | 0.19         | 0.14        | 0.22        | 0.29        | -0.18       | 0.55         | 0.40         | 0.56         |              |              |             |
| <i>trm44</i> | 0.24        | 0.48        | 0.44        | 0.25        | 0.20        | 0.22        | 0.32         | 0.27        | 0.42        | 0.48        | -0.03       | 0.54         | 0.45         | 0.63         | 0.87         |              |             |
| <i>trm5</i>  | -0.77       | -0.24       | -0.60       | -0.14       | -0.19       | 0.01        | -0.06        | -0.14       | -0.06       | -0.28       | 0.00        | -0.28        | 0.13         | 0.10         | -0.20        | -0.30        |             |
