# Supplementary material for: A Quantitative Systems Approach Reveals Dynamic Control of tRNA Modifications during Cellular Stress
Source: PLoS Genet. 2010 Dec 16;6(12):e1001247. doi: 10.1371/journal.pgen.1001247 (PMC3002981; doi:10.1371/journal.pgen.1001247)
Supplement: Table S4 — Relationships between conserved locations of tRNA ribonucleosides that are altered by exposure or that confer resistance to cytotoxicity in S. cerevisiae. (0.09 MB PDF) [file pgen.1001247.s007.pdf]

| Nucleoside                        | Gene           | Location <sup>a</sup><br>(Occurrence)      | H <sub>2</sub> O <sub>2</sub> |                  | MMS |     | NaOCl |     | NaAsO <sub>2</sub> |     |
|-----------------------------------|----------------|--------------------------------------------|-------------------------------|------------------|-----|-----|-------|-----|--------------------|-----|
|                                   |                |                                            | Qty <sup>b</sup>              | Tox <sup>b</sup> | Qty | Tox | Qty   | Tox | Qty                | Tox |
| m <sup>2</sup> <sub>2</sub> G     | TRM1           | 26 (18)                                    | +                             |                  |     | +   |       |     |                    | +   |
| m <sup>5</sup> U                  | TRM2           | 54 (29)                                    |                               |                  |     |     |       |     |                    |     |
| Gm                                | TRM3           | 18 (9)                                     |                               |                  |     |     | +     |     |                    |     |
|                                   | TRM7           | <b>34</b> (1)                              |                               | +                |     |     | +     |     |                    | +   |
| m <sup>5</sup> C                  | TRM4           | <b>34</b> (1), 40 (1),<br>48 (15), 49 (10) | +                             | +                |     | +   |       | +   |                    | +   |
| m <sup>1</sup> A                  | TRM6           | 58                                         |                               |                  | +   |     |       |     |                    |     |
|                                   | TRM61          | 58                                         |                               |                  |     |     |       |     |                    |     |
| Cm                                | TRM7           | <u>32</u> (3), <b>34</b> (1)               | +                             | +                |     |     |       |     |                    | +   |
|                                   | TRM13          | 4 (3)                                      |                               |                  |     |     |       |     |                    |     |
| m <sup>7</sup> G                  | TRM8/<br>TRM82 | 46                                         |                               |                  | +   |     |       |     |                    |     |
| mcm <sup>5</sup> U                | TRM9           | <b>34</b>                                  | +                             |                  |     | +   | +     |     | +                  | +   |
| mcm <sup>5</sup> s <sup>2</sup> U | TRM9           | <b>34</b>                                  |                               |                  |     |     |       |     |                    | +   |
| m <sup>1</sup> G                  | TRM10          |                                            |                               |                  |     |     |       |     |                    |     |
|                                   | TRM5           | <u>37</u>                                  |                               |                  |     |     |       |     |                    |     |
| m <sup>2</sup> G                  | TRM11          | 10                                         |                               |                  |     |     | +     |     | +                  |     |
|                                   | TRM112         | 10                                         |                               |                  |     |     |       |     |                    |     |
| yW                                | TRM12          | <u>37</u>                                  |                               |                  |     |     | +     |     |                    |     |
|                                   | <b>TRM7?</b>   |                                            |                               |                  |     |     |       |     |                    |     |
|                                   | TRM5           |                                            |                               |                  |     |     |       |     |                    |     |
| ncm <sup>5</sup> Um               | <b>TRM7?</b>   |                                            |                               |                  |     |     |       |     |                    |     |
| Um                                | TRM44          | 44                                         |                               |                  |     |     |       |     |                    | +   |
| I                                 | TAD1           | <u>37</u>                                  |                               |                  |     |     | +     |     |                    |     |
| i <sup>6</sup> A                  | MOD5           | <u>37</u>                                  |                               |                  |     |     | +     |     |                    |     |
| ac <sup>4</sup> C                 | TAN1           | 12                                         |                               |                  |     |     |       |     |                    |     |
| m <sup>3</sup> C                  | ?              | <u>32</u>                                  |                               |                  | +   |     |       |     |                    |     |
| Y                                 | PUS1           | 27, 28, <b>34</b> , <b>35</b>              |                               |                  |     |     |       |     |                    |     |

<sup>a</sup> Location and enzyme data taken from refs. 1-4; numbers indicate tRNA nucleotide position, with the number of occurrences in yeast tRNA in parentheses; bold: anticodon (positions 34-36); underlined: positions within the anticodon loop (positions 31-39).

<sup>b</sup> "Qty": change in the level of the ribonucleoside caused by the agent; "Tox": loss of the secondary modification biosynthetic gene causes to sensitivity to the agent
